# Supplementary material for: Development and validation of an interpretable machine learning model for predicting the risk of 8-year all-cause mortality in Cardiovascular-Kidney-Metabolic Syndrome among older adults: A multicenter and cohort study
Source: Research Square preprint supplement (doi:10.21203/rs.3.rs-8473902/v1), 2026-01-25
Supplement: Supplementary file 1 [file 2d71d0174f5af876f9b18b52.xlsx]

## Sheet: Risk Calculator
CKM Syndrome: 8 Year All-Cause Mortality Prediction
Predictor	Input Value	Coefficient	Score	Notes
Serum Cystatin C		0.727742	0	Range: 0.6 - 1.9
Difficulty bathing	No	0.633097	0	Select from list
Resistance	No	0.378403	0	Select from list
Smoke	No	0.319267	0	Select from list
Treatment for diabetes	No	0.57592	0	Select from list
Walking Speed		-0.470394	0	Range: 0.2 - 1.3
Sex	Male	-0.201605	-0.201605	Select from list
Lung Disease	No	0.27945	0	Select from list
Age		0.070064	0	Range: 60.0 - 99.0
CRP		0.0327856	0	Range: 0.2 - 36.7
		Linear Predictor:	-0.201605
		Baseline S0:	0.999104
Predicted 8-Year Mortality Risk:		0.000732744
