# Supplementary material for: Development and validation of an interpretable machine learning model for predicting the risk of 8-year all-cause mortality in Cardiovascular-Kidney-Metabolic Syndrome among older adults: A multicenter and cohort study
Source: Research Square preprint supplement (doi:10.21203/rs.3.rs-8473902/v1), 2026-01-25
Supplement: Supplementary file 2 [file c4b9c59d1051f0a829dbbc53.docx]

**Supplementary Material**

Supplementary Figure 1 Diagnostic Interpolation plots CHARLS (Variable Missing ≥ 10%)

Supplementary Figure 2 Diagnostic Interpolation plots HRS (Variable Missing ≥ 10%)

Supplementary Figure 3 Heat map of Spearman’s correlation analyses among variables

Supplementary Table 1 Selected Predictors for 8-Year All-Cause Mortality in LASSO


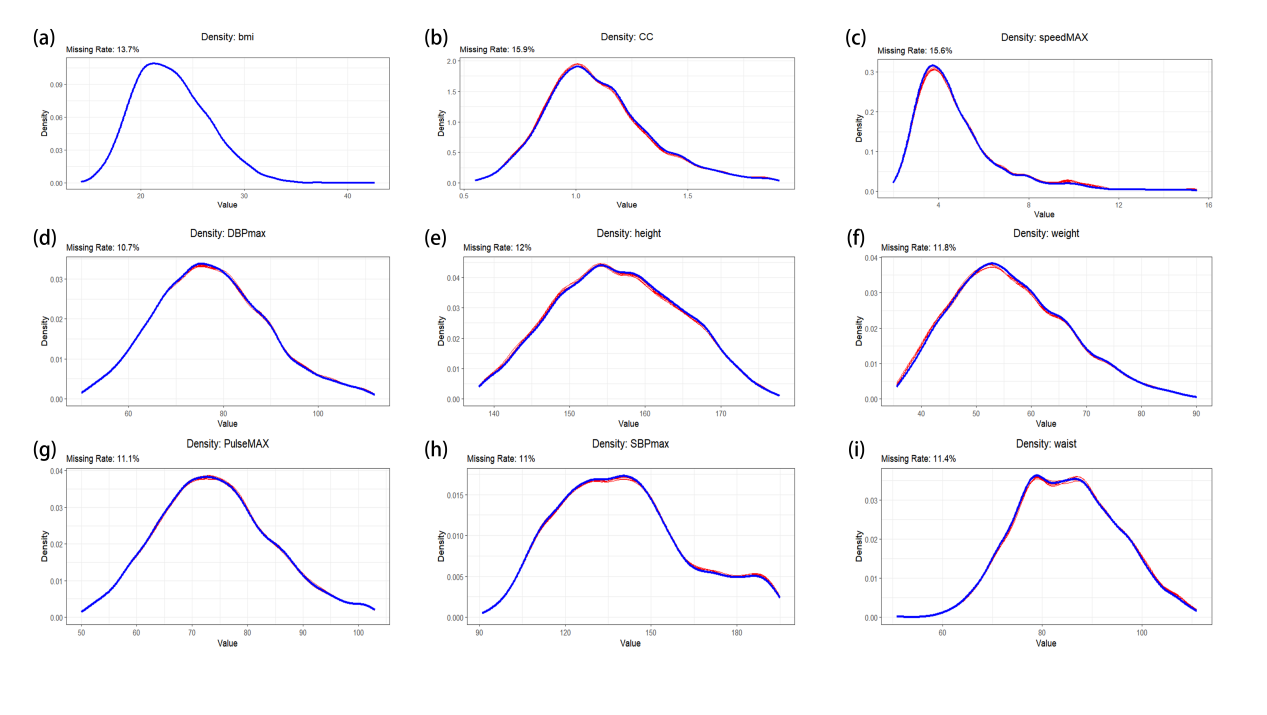


Supplementary Figure 1 Diagnostic Interpolation plots CHARLS (Variable Missing ≥ 10%)


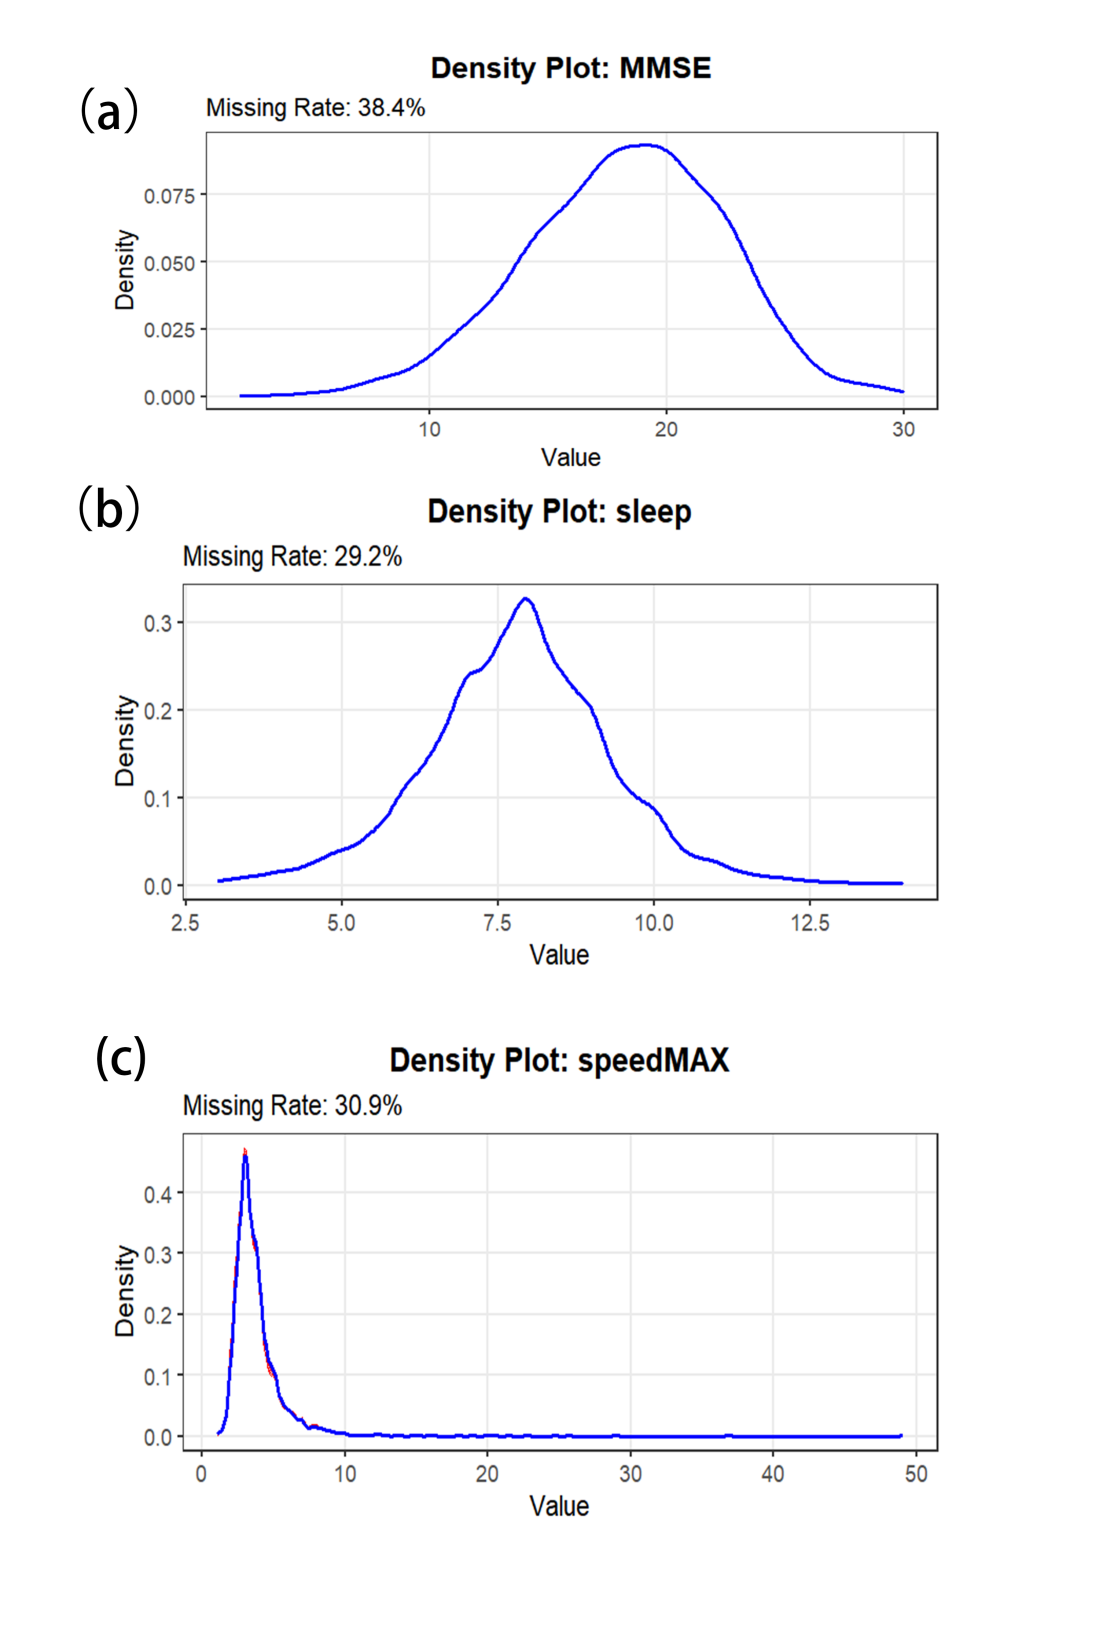


Supplementary Figure 2 Diagnostic Interpolation plots HRS (Variable Missing ≥ 10%)


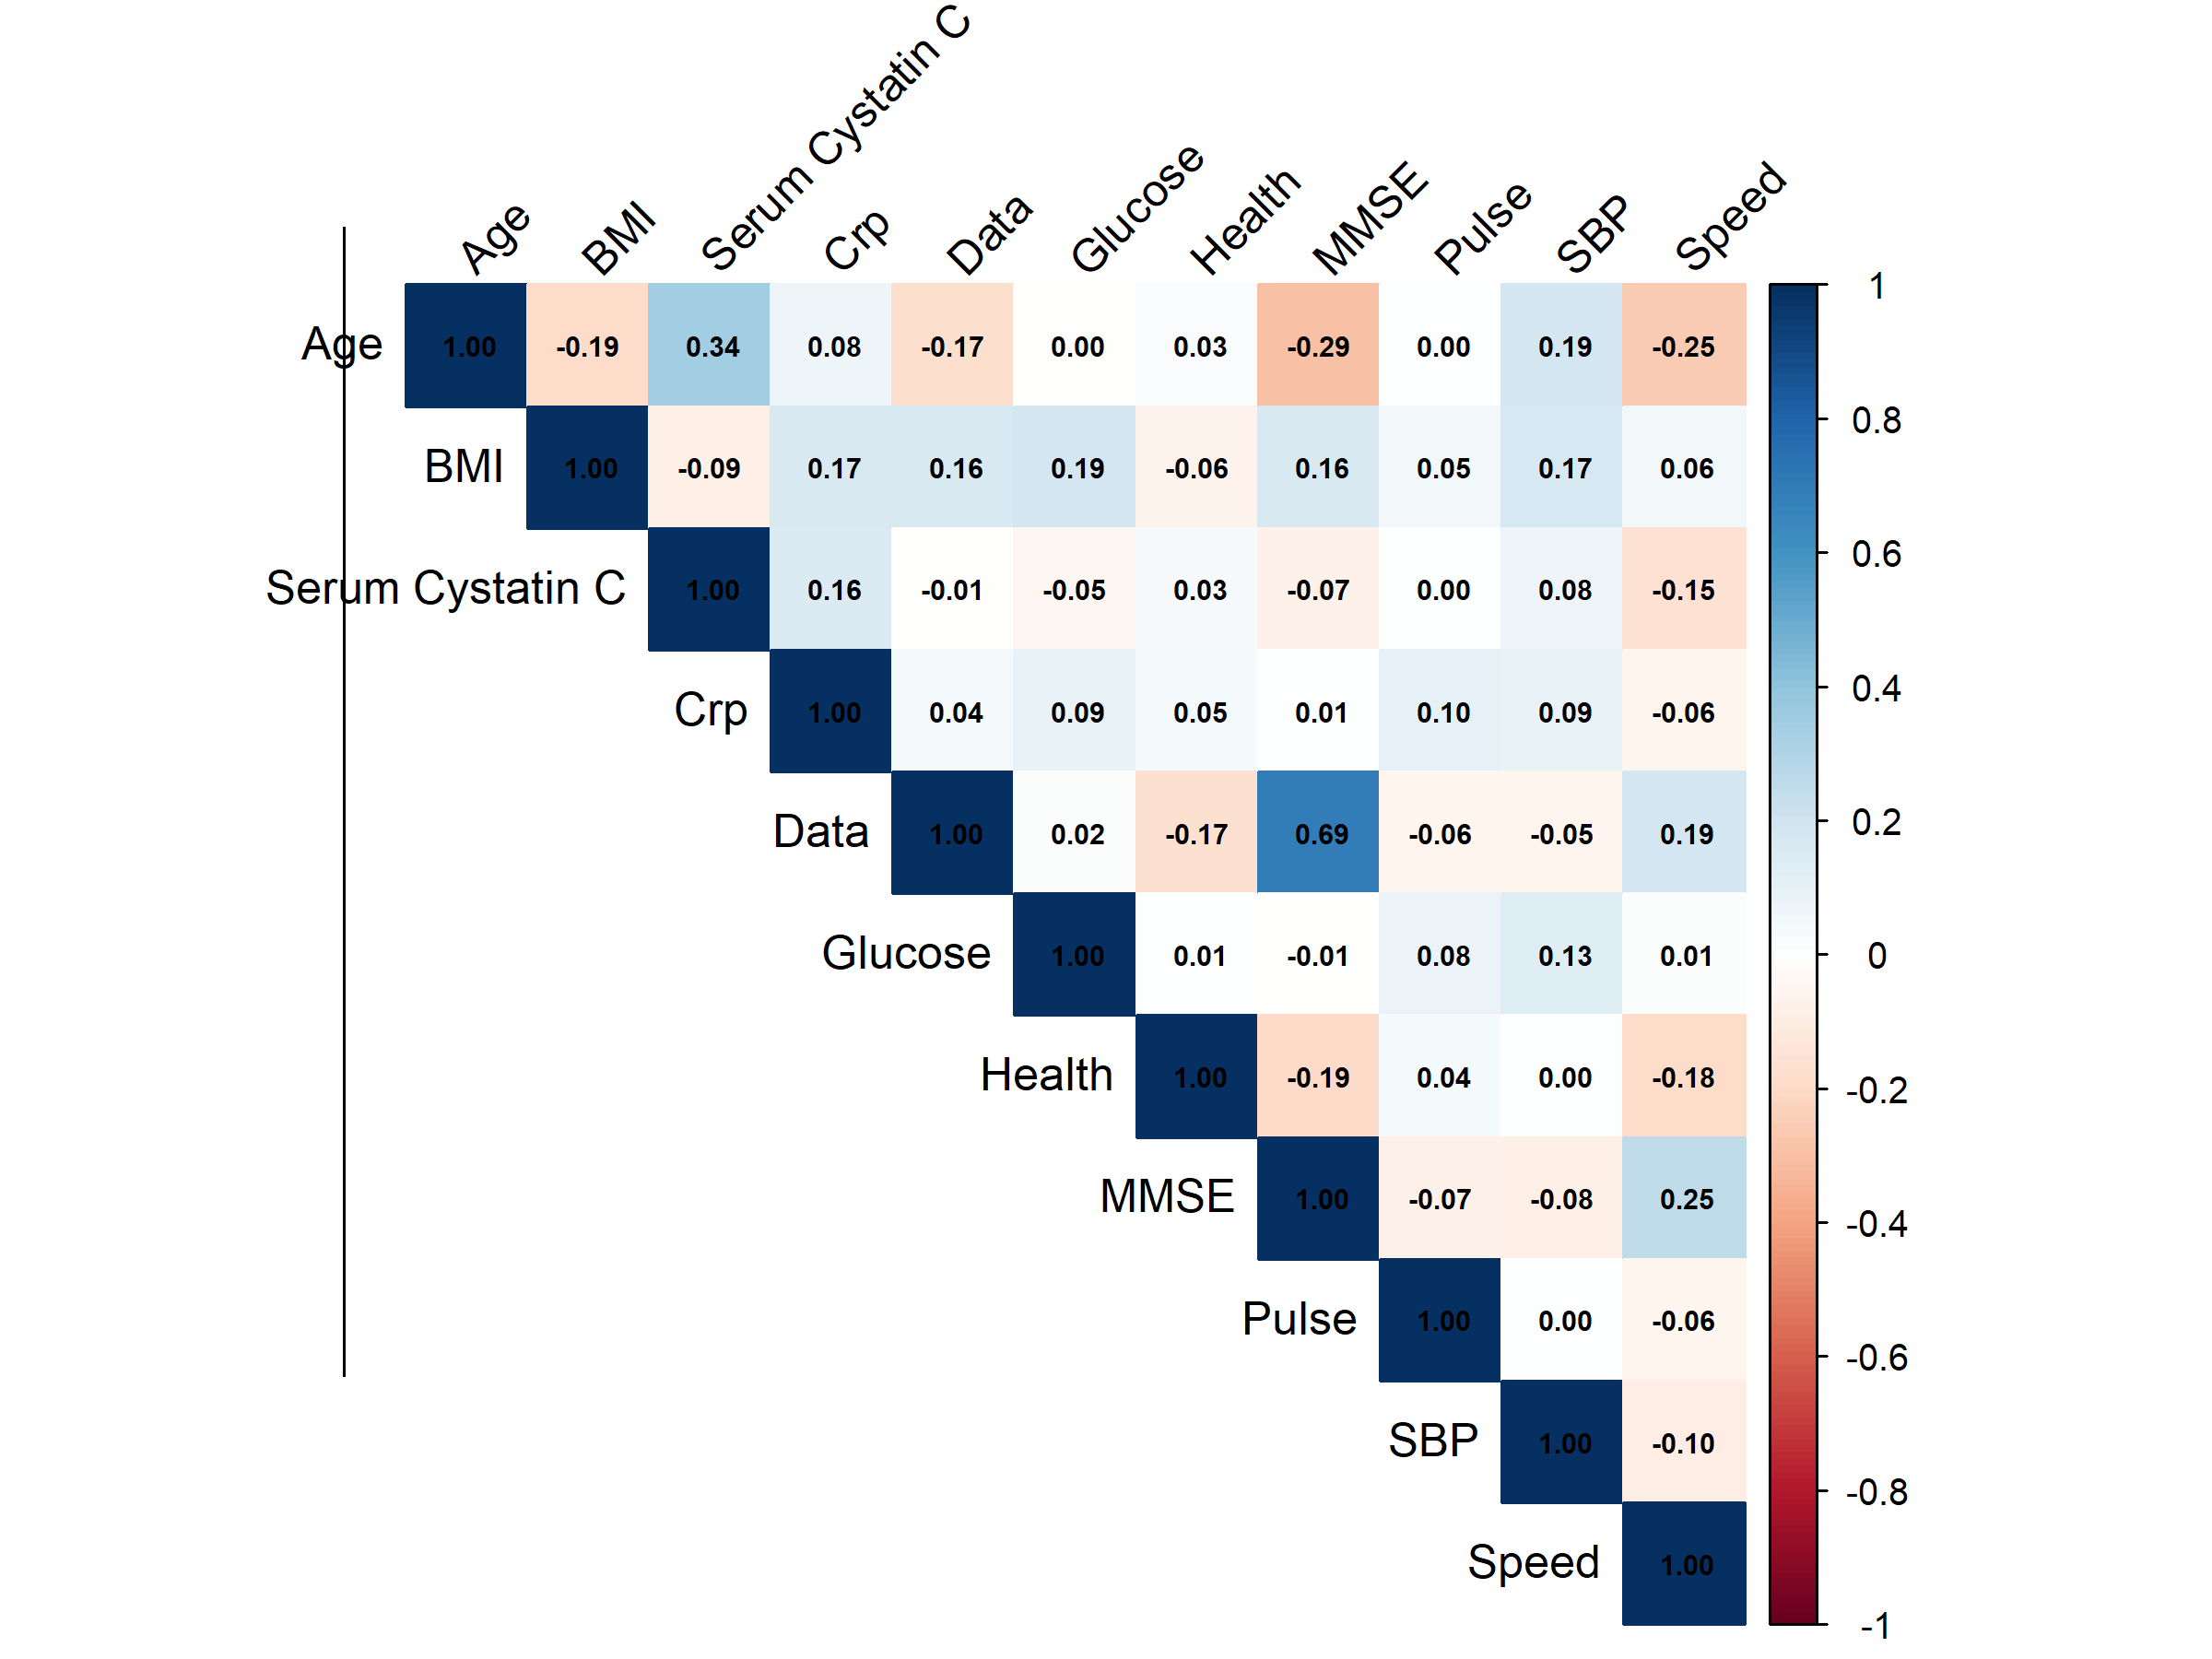


Supplementary Figure 3 Heat map of Spearman’s correlation analyses among variables

Supplementary Table 1 Selected Predictors for 8-Year All-Cause Mortality in LASSO

| **Predictor (Variable)** | **Selection Frequency, N(%)** |
| --- | --- |
| Cystatin C (CC) | 20 (100) |
| ADL Difficulty: Bathing | 20 (100) |
| Smoke | 20 (100) |
| Resistance | 20 (100) |
| Age | 20 (100) |
| CRP | 20 (100) |
| MMSE | 20 (100) |
| Sex | 20 (100) |
| BMI (kg/m²) | 20 (100) |
| Chronic Lung Disease | 19 (95) |
| Pulse Rate | 19 (95) |
| Glucose | 19 (95) |
| Date (MMSE) | 19 (95) |
| Diabetes Treatment | 19 (95) |
| Systolic BP | 17 (85) |
| Self-rated Health | 16 (80) |
| Gait Speed | 16 (80) |
| Marital status | 13 (65) |
| Grip | 13 (65) |
| ADL Difficulty: dress | 11 (55) |
| Frail scale | 6 (30) |
| Teeth | 4 (20) |
| High wasit | 1 (5) |
| Diabetes | 1 (5) |
